# Supplementary material for: Online Information-Seeking About Potential Breast Cancer Symptoms: Capturing Online Behavior With an Internet Browsing Tracking Tool
Source: PubMed Central journal article supplement (PMC6381403; doi:10.2196/12400), 2019-02-06
Supplement: jmir_v21i2e12400_app1.pdf [file jmir_v21i2e12400_app1.pdf]

## Multimedia Appendix 1

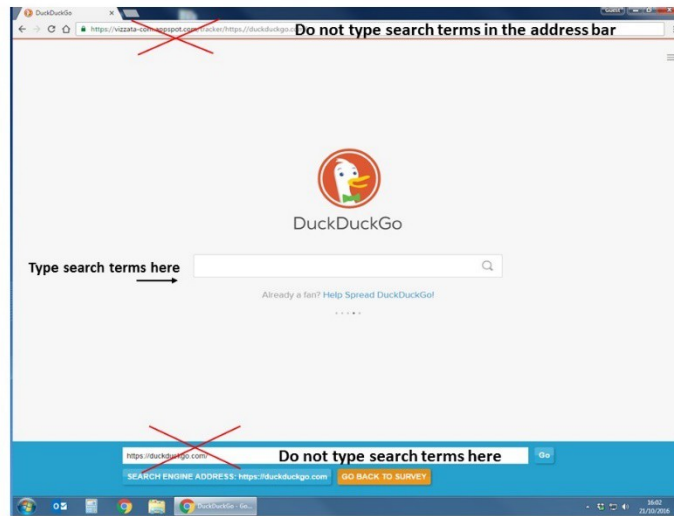

Screenshot of instructions on how to conduct the information-seeking task
